# Supplementary material for: Multiferroic properties and giant piezoelectric effect of a 2D Janus WO3F monolayer
Source: Royal Society of Chemistry journal article supplement (doi:10.1039/d4cp02985b), 2024-01-01
Supplement: d4cp02985b1.pdf [file d4cp02985b1.pdf]

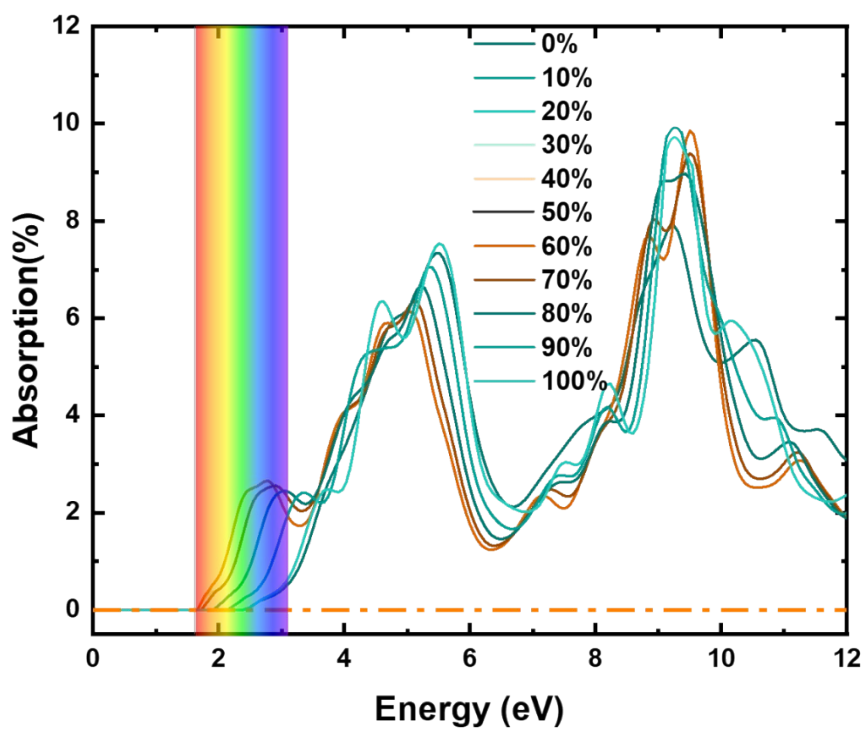

Fig. S1 Optical absorption spectra of the intermediate states between Ferroelectric Phase I and Ferroelectric Phase II, ranging from 0% to 100%. The visible light region is highlighted with a rainbow-colored background.
